# Supplementary material
Source: PubMed Central journal article supplement (PMC5617793)
Supplement: NIHMS869526-supplement-Supplemental_Digital_Content.pdf [file NIHMS869526-supplement-Supplemental_Digital_Content.pdf]

## Supplemental Digital Appendix 1

### History of the Medical Scientist Training Program: List of Institutions and First Year of NIGMS Support

| <b>Institution</b>                              | <b>Year</b> |
|-------------------------------------------------|-------------|
| ALBERT EINSTEIN COLLEGE OF MEDICINE             | 1964        |
| NEW YORK UNIVERSITY                             | 1964        |
| NORTHWESTERN UNIVERSITY AT CHICAGO              | 1964        |
| DUKE UNIVERSITY                                 | 1966        |
| STANFORD UNIVERSITY                             | 1968        |
| UNIVERSITY OF CHICAGO                           | 1968        |
| UNIVERSITY OF WISCONSIN-MADISON                 | 1968        |
| COLUMBIA UNIVERSITY                             | 1969        |
| UNIVERSITY OF PENNSYLVANIA                      | 1969        |
| WASHINGTON UNIVERSITY                           | 1969        |
| YALE UNIVERSITY                                 | 1969        |
| UNIVERSITY OF WASHINGTON                        | 1970        |
| UNIVERSITY OF ROCHESTER                         | 1973        |
| CORNELL UNIVERSITY MEDICAL CENTER               | 1974        |
| HARVARD UNIVERSITY MEDICAL SCHOOL               | 1974        |
| CASE WESTERN RESERVE UNIVERSITY                 | 1975        |
| JOHNS HOPKINS UNIVERSITY                        | 1975        |
| UNIVERSITY OF CALIFORNIA SAN DIEGO              | 1975        |
| BAYLOR COLLEGE OF MEDICINE                      | 1977        |
| EMORY UNIVERSITY                                | 1977        |
| MOUNT SINAI SCHOOL OF MEDICINE                  | 1977        |
| UNIVERSITY OF IOWA                              | 1977        |
| UNIVERSITY OF VIRGINIA                          | 1977        |
| UNIVERSITY OF CALIFORNIA SAN FRANCISCO          | 1978        |
| VANDERBILT UNIVERSITY MEDICAL CENTER            | 1980        |
| UNIVERSITY OF MICHIGAN                          | 1982        |
| UNIVERSITY OF TEXAS SOUTHWESTERN MEDICAL CENTER | 1982        |
| UNIVERSITY OF CALIFORNIA LOS ANGELES            | 1983        |
| UNIVERSITY OF PITTSBURGH AT PITTSBURGH          | 1987        |
| UNIVERSITY OF MINNESOTA                         | 1988        |
| STATE UNIVERSITY NEW YORK STONY BROOK           | 1992        |
| UNIVERSITY OF ALABAMA AT BIRMINGHAM             | 1992        |
| UNIVERSITY OF COLORADO DENVER                   | 1993        |
| TUFTS UNIVERSITY BOSTON                         | 1995        |
| PENNSYLVANIA STATE UNIVERSITY                   | 1998        |
| MEDICAL UNIVERSITY OF SOUTH CAROLINA            | 1999        |

|                                                           |      |
|-----------------------------------------------------------|------|
| UNIVERSITY OF NORTH CAROLINA CHAPEL HILL                  | 1999 |
| UNIVERSITY OF CALIFORNIA IRVINE                           | 1999 |
| UNIVERSITY OF CONNECTICUT SCHOOL OF<br>MEDICINE/DENTISTRY | 1999 |
| UNIVERSITY OF ILLINOIS                                    | 1999 |
| UNIVERSITY OF CINCINNATI                                  | 2002 |
| MAYO CLINIC ROCHESTER                                     | 2003 |
| OREGON HEALTH AND SCIENCE UNIVERSITY                      | 2004 |
| INDIANA UNIVERSITY-PURDUE AT INDIANAPOLIS                 | 2008 |
| MEDICAL COLLEGE OF WISCONSIN                              | 2010 |
| UNIVERSITY OF MARYLAND BALTIMORE                          | 2010 |
| OHIO STATE UNIVERSITY                                     | 2011 |
| UNIVERSITY OF MASSACHUSETTS MEDICAL<br>SCHOOL–WORCESTER   | 2013 |

Many, but not all, of these programs have been continuously funded or experienced only a brief hiatus in funding since their first year of support.

Abbreviation: NIGMS indicates National Institute of General Medical Sciences.
